# Supplementary material
Source: HighWire-hosted journal article supplement (https://qualitysafety.bmj.com/highwire/filestream/161449/field_highwire_adjunct_files/2/bmjqs-2021-014529supp003_data_supplement.pdf)

## Appendix 3 Initial programme theory

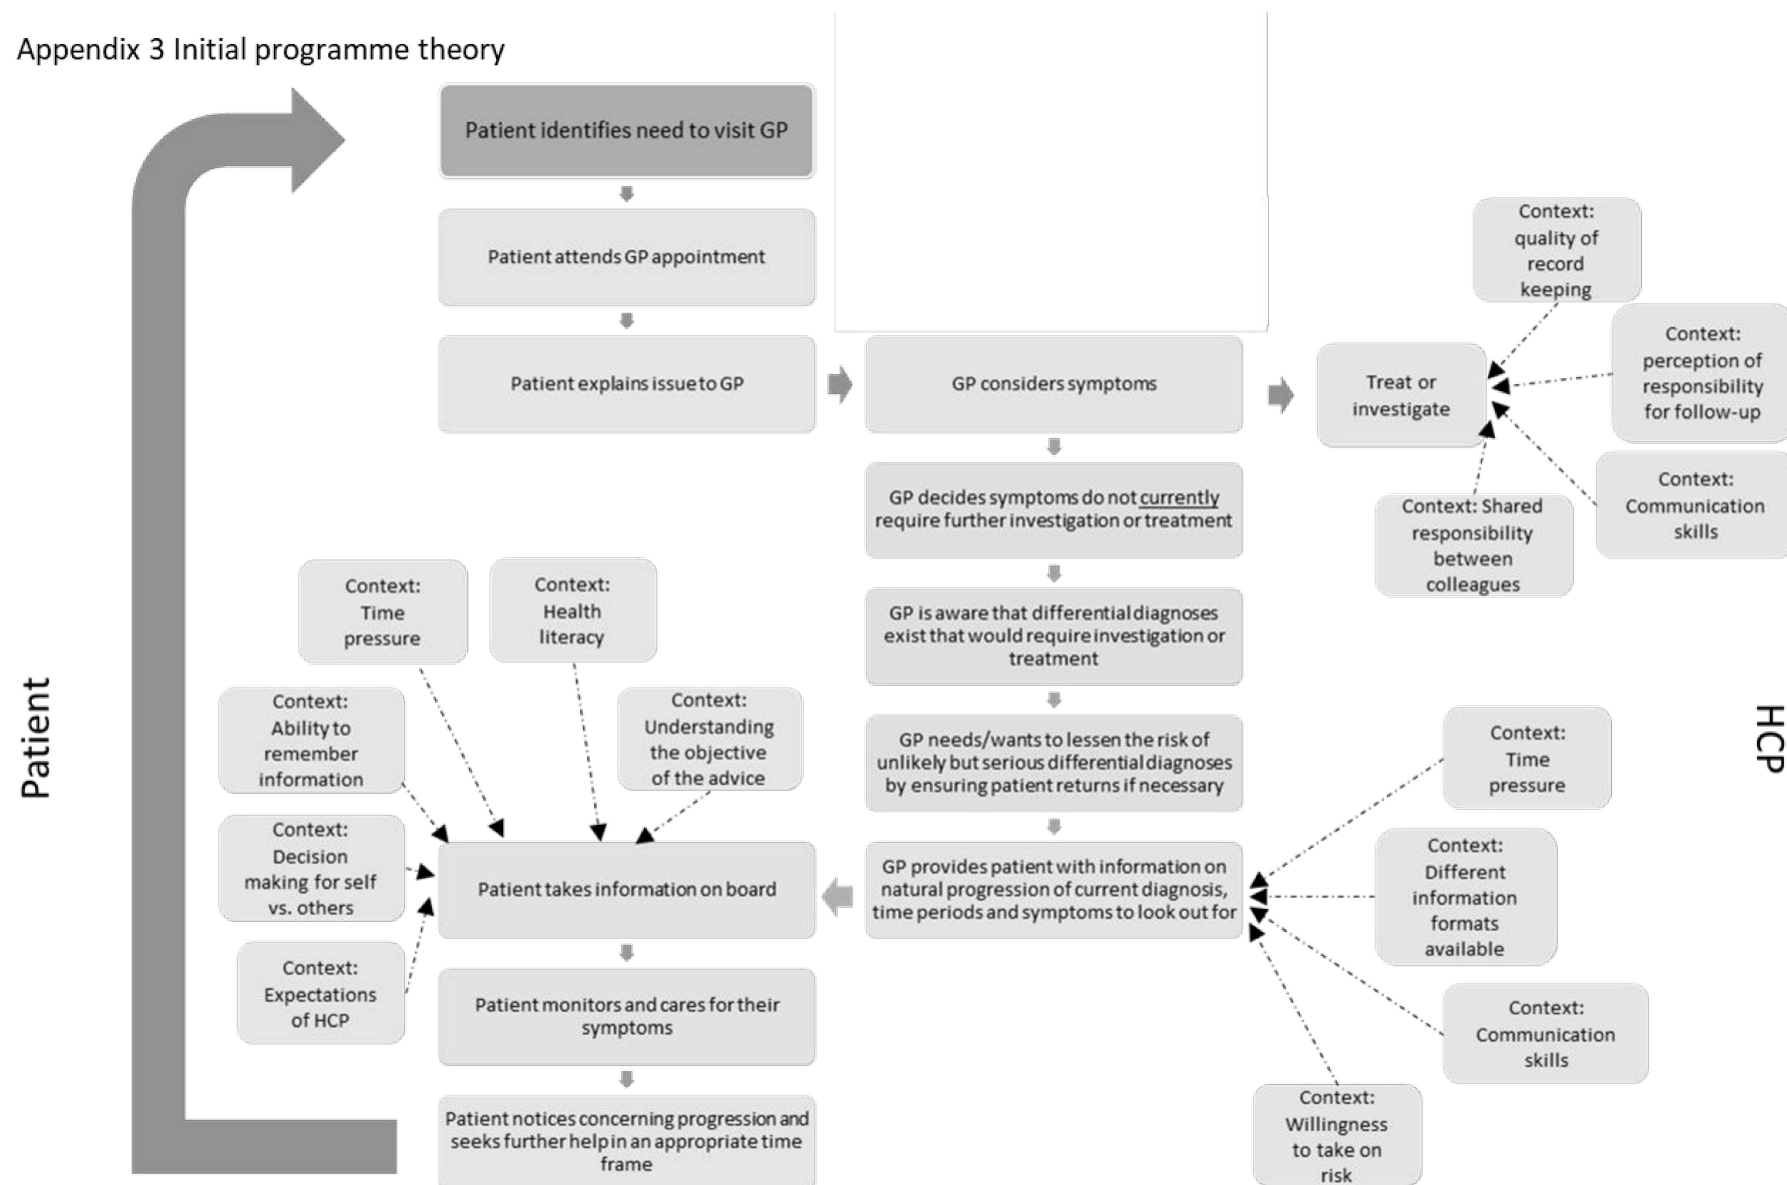

Supplement: bmjqs-2021-014529supp003_data_supplement.pdf [file bmjqs-2021-014529supp003_data_supplement.pdf]
